# Supplementary material for: Analysis of Gut Characteristics and Microbiota Changes with Maternal Supplementation in a Neural Tube Defect Mouse Model
Source: MDPI journal article supplement (doi:10.3390/nu15234944), 2023-11-28
Supplement: s1 [file s1]

# Supplementary Materials:

**Table S1.** Study of global differences in microbial composition among experimental groups using a permutational ANOVA (permanova). (A) Permanova results for beta diversity at phylum level. (B) Permanova results for beta diversity at genus level.

| Comparisons                                                                        | Df | SumsOfSqs | F.Model | R2    | <i>p</i> -value | <i>p</i> -adjusted |
|------------------------------------------------------------------------------------|----|-----------|---------|-------|-----------------|--------------------|
| <b>(A) Phylum beta diversity permanova</b>                                         |    |           |         |       |                 |                    |
| F- <i>Vangl2</i> <sup>+/+</sup> vs F- <i>Vangl2</i> <sup>+/-Lp</sup>               | 1  | 0.029     | 0.941   | 0.056 | 0.33            | 0.801              |
| F- <i>Vangl2</i> <sup>+/-Lp</sup> vs C- <i>Vangl2</i> <sup>+/-Lp</sup>             | 1  | 0.138     | 3.875   | 0.195 | 0.067           | 0.268              |
| C- <i>Vangl2</i> <sup>+/-Lp</sup> vs C- <i>Vangl2</i> <sup>+/-Lp</sup> -P          | 1  | 0.027     | 1.315   | 0.076 | 0.276           | 0.801              |
| C- <i>Vangl2</i> <sup>+/-Lp</sup> -P-NS vs C- <i>Vangl2</i> <sup>+/-Lp</sup> -P-FA | 1  | 0.044     | 3.756   | 0.190 | 0.053           | 0.265              |
| C- <i>Vangl2</i> <sup>+/-Lp</sup> -P-NS vs C- <i>Vangl2</i> <sup>+/-Lp</sup> -P-CI | 1  | 1         | 0.020   | 1.176 | 0.068           | 0.267              |
| <b>(B) Genus beta diversity permanova</b>                                          |    |           |         |       |                 |                    |
| F- <i>Vangl2</i> <sup>+/+</sup> vs F- <i>Vangl2</i> <sup>+/-Lp</sup>               | 1  | 0.058     | 2.211   | 0.121 | 0.084           | 0.336              |
| F- <i>Vangl2</i> <sup>+/-Lp</sup> vs C- <i>Vangl2</i> <sup>+/-Lp</sup>             | 1  | 0.153     | 5.815   | 0.267 | 0.001           | 0.005              |
| C- <i>Vangl2</i> <sup>+/-Lp</sup> vs C- <i>Vangl2</i> <sup>+/-Lp</sup> -P          | 1  | 0.012     | 0.629   | 0.038 | 0.647           | 0.647              |
| C- <i>Vangl2</i> <sup>+/-Lp</sup> -P-NS vs C- <i>Vangl2</i> <sup>+/-Lp</sup> -P-FA | 1  | 0.026     | 1.661   | 0.094 | 0.152           | 0.336              |
| C- <i>Vangl2</i> <sup>+/-Lp</sup> -P-NS vs C- <i>Vangl2</i> <sup>+/-Lp</sup> -P-CI | 1  | 0.033     | 1.898   | 0.106 | 0.111           | 0.336              |

F, feces; C, cecum; P, pregnant; NS, non-supplemented; FA, supplemented with folic acid; CI, supplemented with D-*chiro*-inositol. *n* = 9 female mice per group.

**Table S2.** Significant differences at the genus level of microbiota from feces and cecum of non-pregnant *Vangl2<sup>+/Lp</sup>* female mice ( $n = 9$  per group).

| Phylum                   | Genus                                     | logFC | <i>p</i> -value       | FDR                   |
|--------------------------|-------------------------------------------|-------|-----------------------|-----------------------|
| <i>p_Actinobacteria</i>  | <i>g_Adlercreutzia</i>                    | -1.57 | $8.98 \times 10^{-3}$ | $3.46 \times 10^{-2}$ |
| <i>p_Bacteroidetes</i>   | <i>f_[Barnesiellaceae]_unclassified</i>   | -0.85 | $1.41 \times 10^{-3}$ | $8.14 \times 10^{-3}$ |
| <i>p_Deferribacteres</i> | <i>g_Mucispirillum</i>                    | 2.71  | $6.88 \times 10^{-4}$ | $5.94 \times 10^{-3}$ |
| <i>p_Firmicutes</i>      | <i>c_Bacilli_unclassified</i>             | -1.24 | $2.84 \times 10^{-4}$ | $3.28 \times 10^{-3}$ |
|                          | <i>g_Staphylococcus</i>                   | -0.74 | $1.00 \times 10^{-2}$ | $3.69 \times 10^{-2}$ |
|                          | <i>g_Enterococcus</i>                     | -3.05 | $2.74 \times 10^{-4}$ | $3.28 \times 10^{-3}$ |
|                          | <i>g_Lactobacillus</i>                    | -1.79 | $2.45 \times 10^{-3}$ | $1.17 \times 10^{-2}$ |
|                          | <i>g_Lactococcus</i>                      | -2.78 | $2.40 \times 10^{-4}$ | $3.28 \times 10^{-3}$ |
|                          | <i>g_Streptococcus</i>                    | -1.52 | $1.32 \times 10^{-3}$ | $8.14 \times 10^{-3}$ |
|                          | <i>g_Candidatus_Arthromitus</i>           | -2.93 | $5.84 \times 10^{-4}$ | $5.91 \times 10^{-3}$ |
|                          | <i>g_Dehalobacterium</i>                  | 1.43  | $2.79 \times 10^{-5}$ | $1.13 \times 10^{-3}$ |
|                          | <i>g_Anaerofustis</i>                     | 2.55  | $1.35 \times 10^{-4}$ | $3.28 \times 10^{-3}$ |
|                          | <i>f_Lachnospiraceae_unclassified</i>     | 0.62  | $7.86 \times 10^{-3}$ | $3.18 \times 10^{-2}$ |
|                          | <i>g_Blautia</i>                          | -1.01 | $7.33 \times 10^{-4}$ | $5.94 \times 10^{-3}$ |
|                          | <i>g_Marvinbryantia</i>                   | -0.98 | $1.38 \times 10^{-2}$ | $4.46 \times 10^{-2}$ |
|                          | <i>g_Anaerotruncus</i>                    | 2.38  | $9.23 \times 10^{-4}$ | $6.27 \times 10^{-3}$ |
|                          | <i>f_Erysipelotrichaceae_unclassified</i> | -1.85 | $1.43 \times 10^{-2}$ | $4.46 \times 10^{-2}$ |
|                          | <i>g_[Eubacterium]</i>                    | -1.37 | $5.66 \times 10^{-3}$ | $2.41 \times 10^{-2}$ |
|                          | <i>g_Coprobacillus</i>                    | -2.71 | $2.15 \times 10^{-4}$ | $3.28 \times 10^{-3}$ |
| <i>p_Proteobacteria</i>  | <i>c_Betaproteobacteria_unclassified</i>  | -0.97 | $1.36 \times 10^{-2}$ | $4.46 \times 10^{-2}$ |
|                          | <i>g_Bilophila</i>                        | 2.12  | $2.16 \times 10^{-3}$ | $1.10 \times 10^{-2}$ |
|                          | <i>g_Desulfovibrio</i>                    | 1.60  | $1.16 \times 10^{-2}$ | $4.10 \times 10^{-2}$ |
|                          | <i>g_Helicobacter</i>                     | 3.06  | 0                     | $1.30 \times 10^{-6}$ |
|                          | <i>g_Escherichia</i>                      | -1.37 | $9.29 \times 10^{-4}$ | $6.27 \times 10^{-3}$ |

The significant changes were determined using a Zero-inflated Gaussian mixture model using metagenomeSeq. logFC, log2 foldchange; FDR, False Discovery Rate adjusted *p*-value.
